# Supplementary material for: Synergetic anticancer activity of gold porphyrin appended to phenyl tin malonate organometallic complexes
Source: Royal Society of Chemistry journal article supplement (doi:10.1039/d0dt03792c), 2021-01-01
Supplement: d0dt03792c1.pdf [file d0dt03792c1.pdf]

## Supporting information materials of Synergetic anticancer activity of gold porphyrin appended to phenyl tin malonate organometallic complexes

Christophe Nguyen,<sup>a#</sup> Isabelle Toubia,<sup>bc#</sup> Stéphane Diring,<sup>b</sup> Kamel Hadj-Kaddour,<sup>a</sup> Magali Gary-Bobo,<sup>\*a</sup> Marwan Kobeissi,<sup>\*c</sup> Fabrice Odobel<sup>\*b</sup>

<sup>a</sup>CEISAM, Chimie Et Interdisciplinarité, Synthèse, Analyse, Modélisation, CNRS, UMR CNRS 6230, UFR des Sciences et des Techniques ; 2, rue de la Houssinière - BP 92208; 44322 NANTES Cedex 3 (France). E-mail:[Fabrice.Odobel@univ-nantes.fr](mailto:Fabrice.Odobel@univ-nantes.fr)

<sup>b</sup>IBMM, Institut des Biomolécules Max Mousseron, UMR 5247 CNRS, UM-Faculté de Pharmacie, 15 Avenue Charles 9 Flahault, 34093, Montpellier cedex 05 (France). E-mail : [magali.gary-bobo@inserm.fr](mailto:magali.gary-bobo@inserm.fr)

<sup>c</sup>Laboratoire RammalRammal, Equipe de Synthèse Organique Appliquée SOA, Université Libanaise, Faculté des Sciences 5, Nabatieh, Liban. E-mail: [mkobeissi@ul.edu.lb](mailto:mkobeissi@ul.edu.lb)

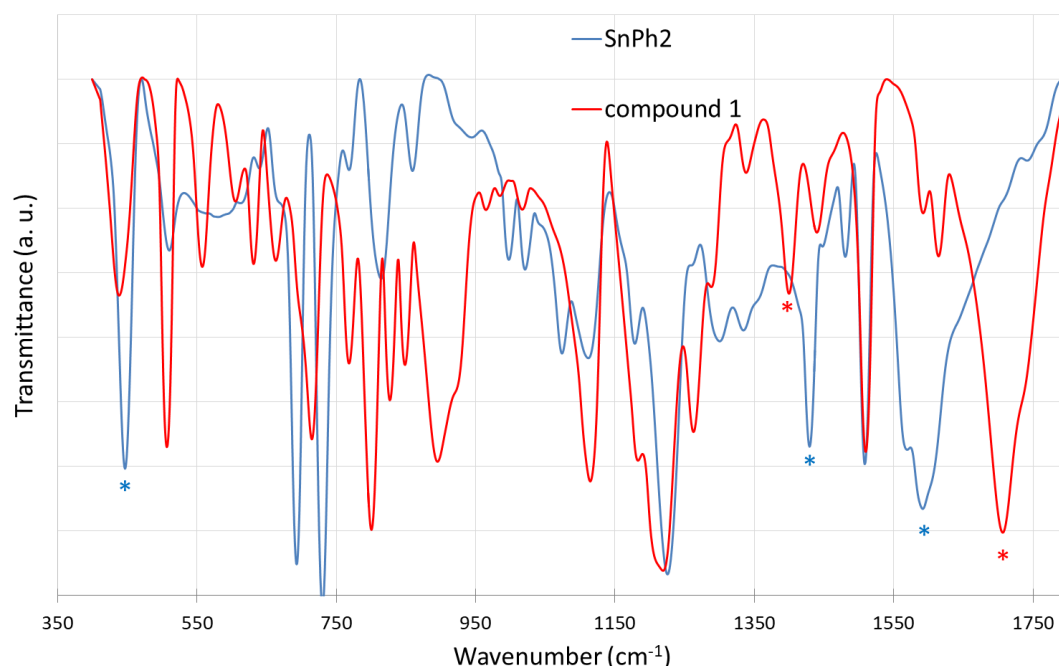

**Figure S1.** Overlay of the IR spectra of compounds **1** and **SnPh<sub>2</sub>** recorded in solid state by ATR-IR spectroscopy. The asterisks indicate the carboxylate antisymmetric ( $\nu_{as}$ ) and symmetric ( $\nu_s$ ) and Sn-O stretching bands.

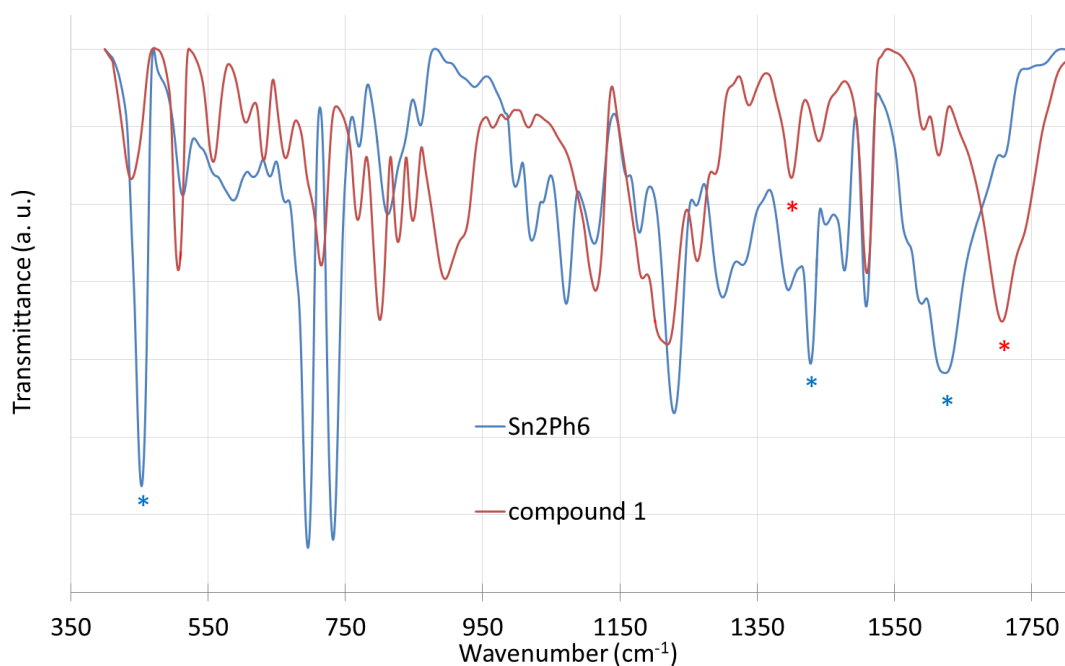

**Figure S2.** Overlay of the IR spectra of compounds **1** and **Sn<sub>2</sub>Ph<sub>6</sub>** recorded in solid state by ATR-IR spectroscopy. The asterisks indicate the O-C=O antisymmetric ( $\nu_{as}$ ) and symmetric ( $\nu_s$ ) and Sn-O stretching bands.

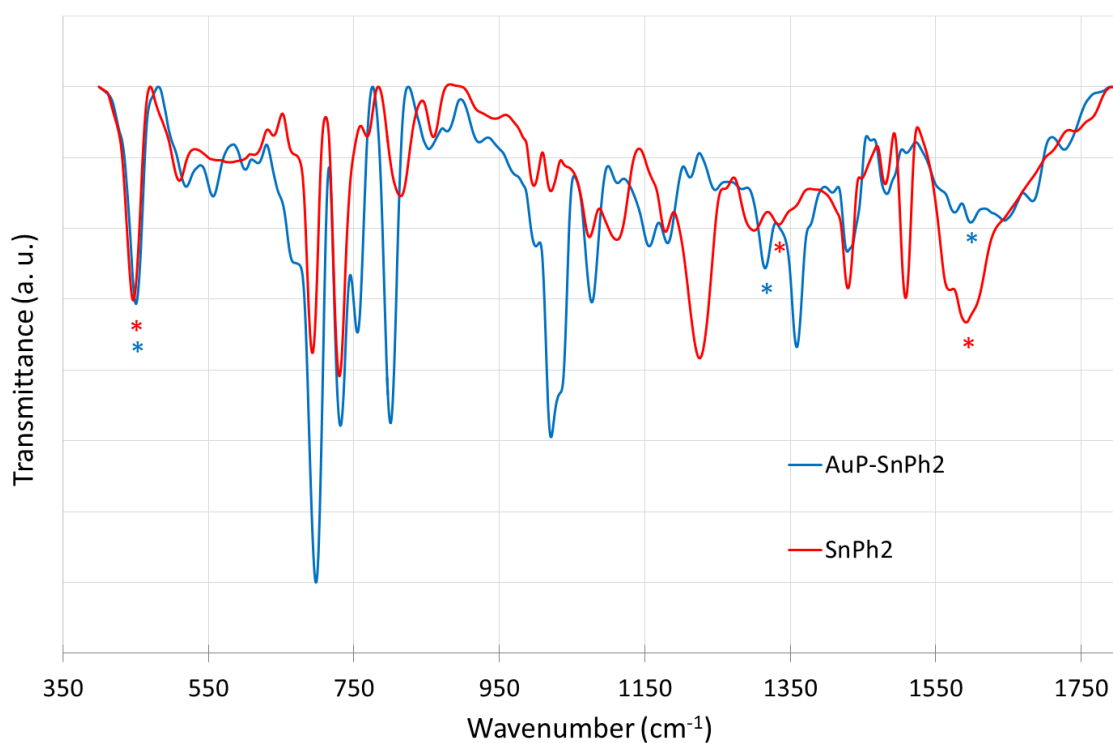

**Figure S3.** Overlay of the IR spectra of compounds **SnPh<sub>2</sub>** and **AuP-SnPh<sub>2</sub>** recorded in solid state by ATR-IR spectroscopy. The asterisks indicate the carboxylate antisymmetric ( $\nu_{as}$ ) and symmetric ( $\nu_s$ ) and Sn-O stretching bands.

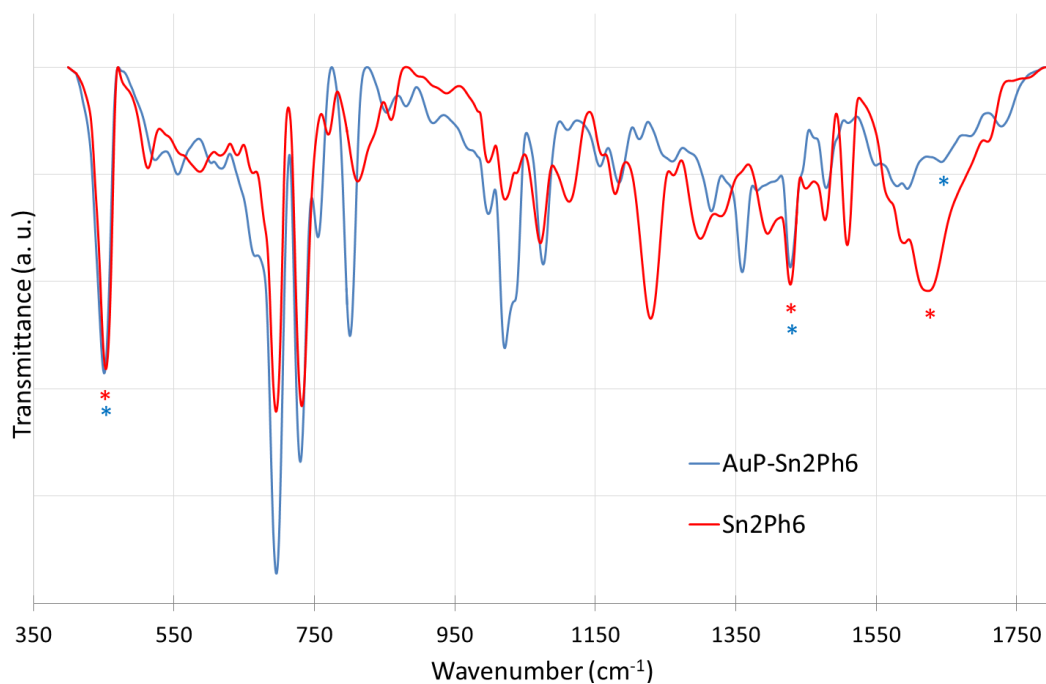

**Figure S4.** Overlay of the IR spectra of compounds  $\text{Sn}_2\text{Ph}_6$  and  $\text{AuP-Sn}_2\text{Ph}_6$  recorded in solid state by ATR-IR spectroscopy. The asterisks indicate the carboxylate antisymmetric ( $\nu_{\text{as}}$ ) and symmetric ( $\nu_{\text{s}}$ ) and Sn-O stretching bands.

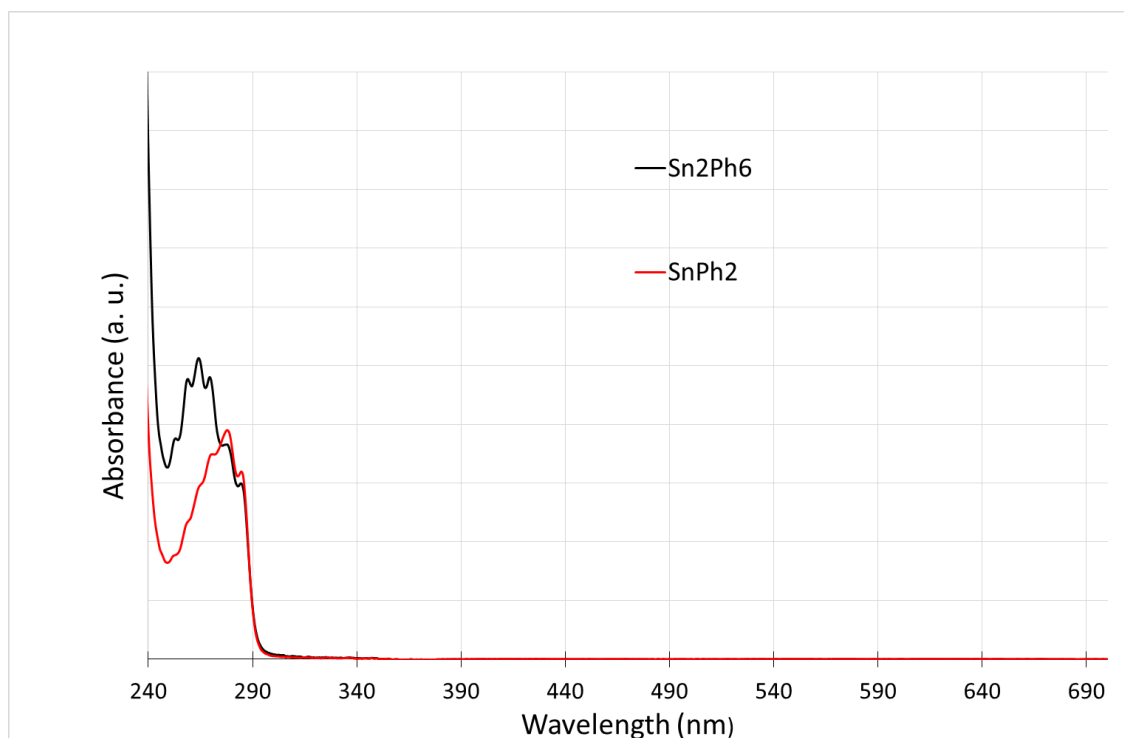

**Figure S5.** Overlay of the UV-Vis. absorption spectra of compounds  $\text{Sn}_2\text{Ph}_6$  and  $\text{Sn}_2\text{Ph}_6$  recorded in dichloromethane.

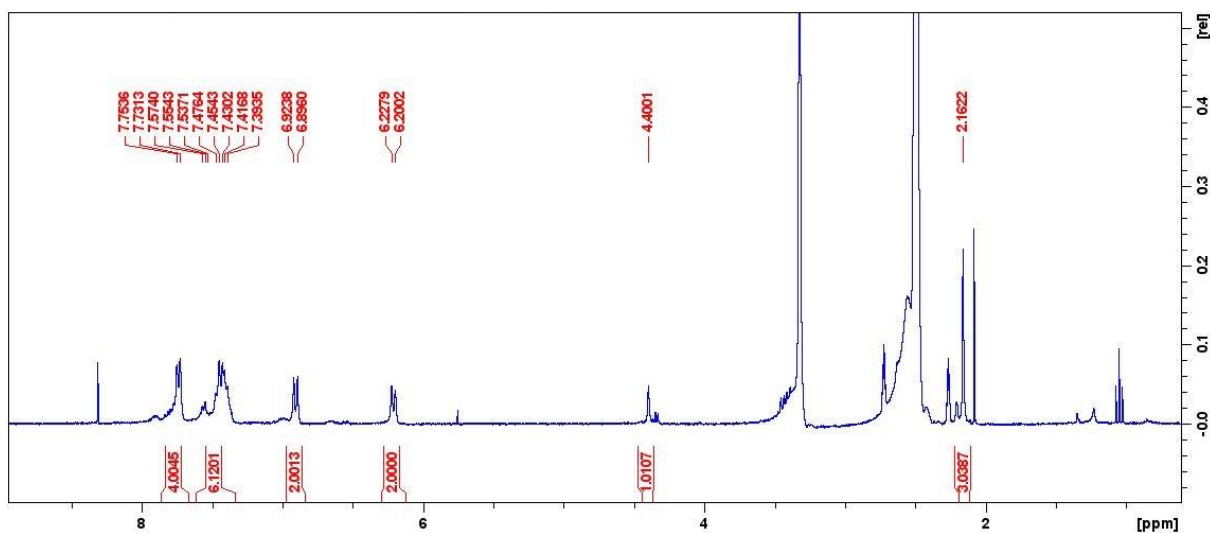

Figure S6.  $^1\text{H}$  NMR spectrum of  $\text{SnPh}_2$  recorded in  $\text{DMSO-d}_6$ .

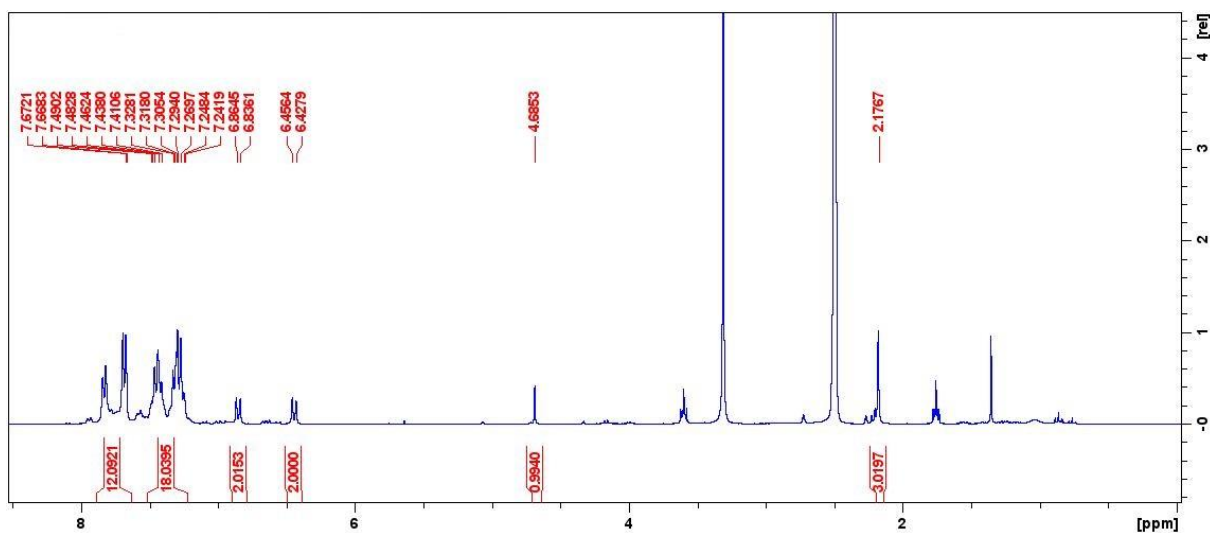

Figure S7.  $^1\text{H}$  NMR spectrum of  $\text{Sn}_2\text{Ph}_6$  recorded in  $\text{DMSO-d}_6$ .

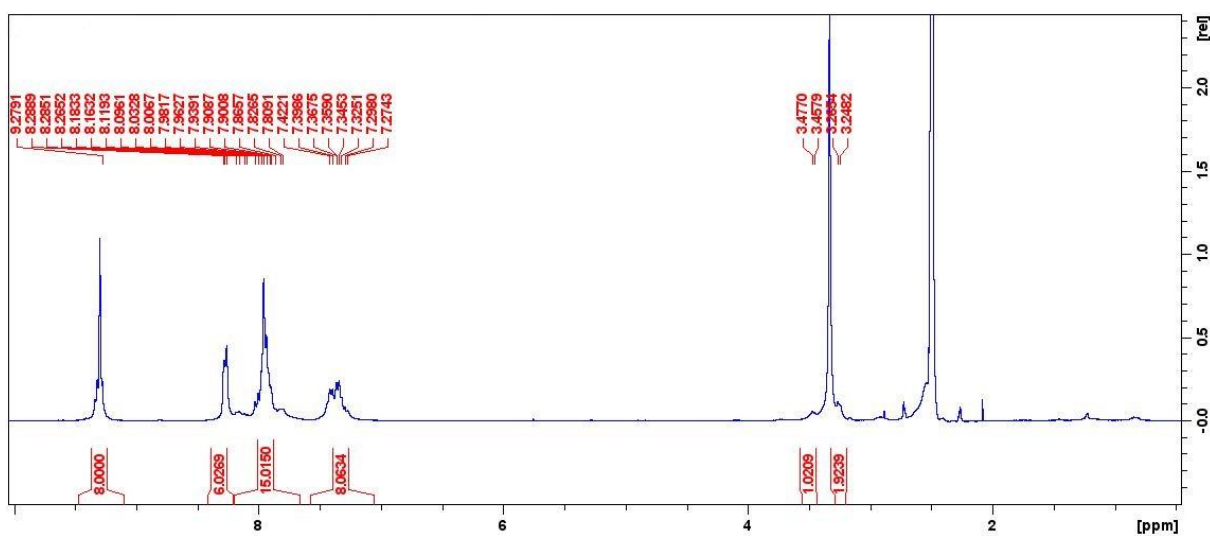

Figure S8.  $^1\text{H}$  NMR spectrum of  $\text{AuP-SnPh}_2$  recorded in  $\text{DMSO-d}_6$ .

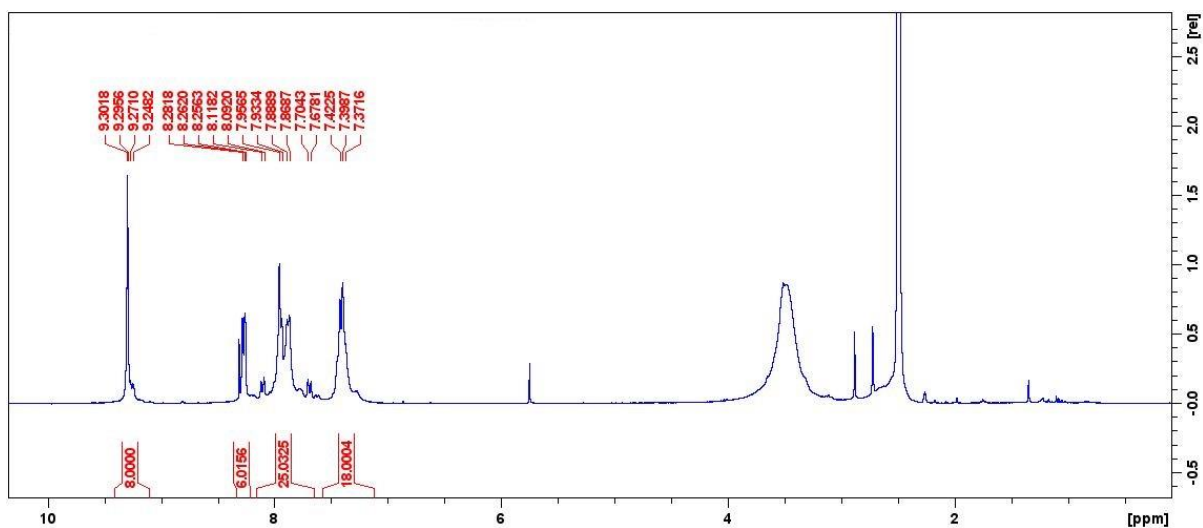

Figure S9.  $^1\text{H}$  NMR spectrum of  $\text{AuP-Sn}_2\text{Ph}_6$  recorded in  $\text{DMSO-d}_6$ .

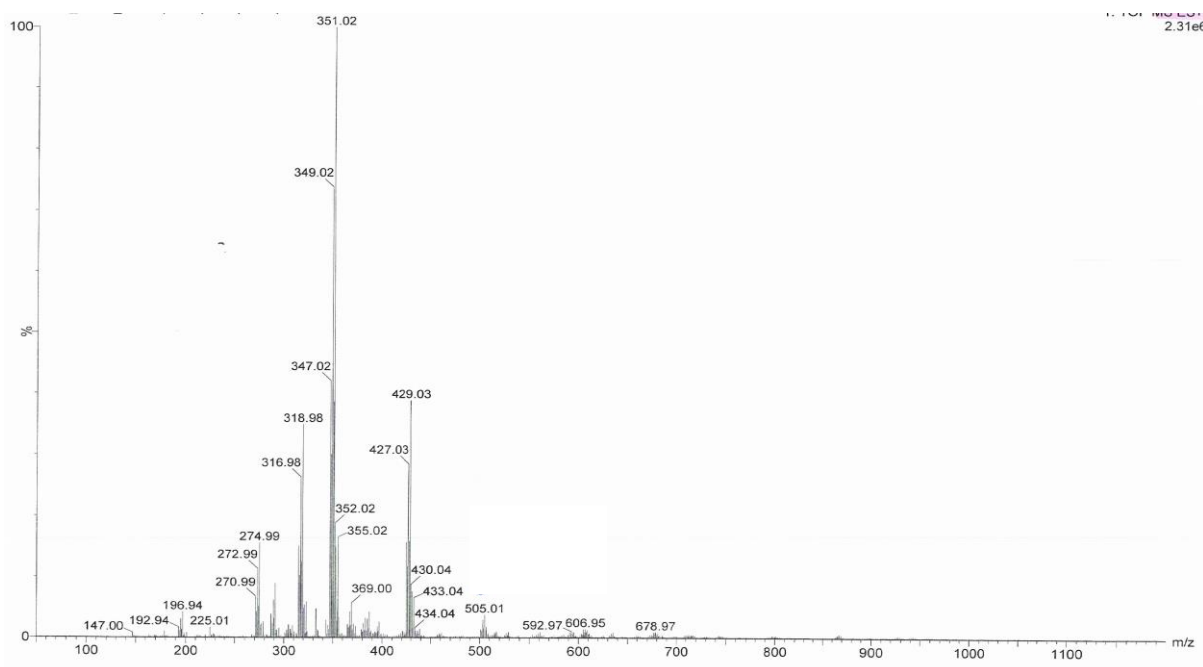

Figure S10. ES-MS spectrum of  $\text{SnPh}_2$ .

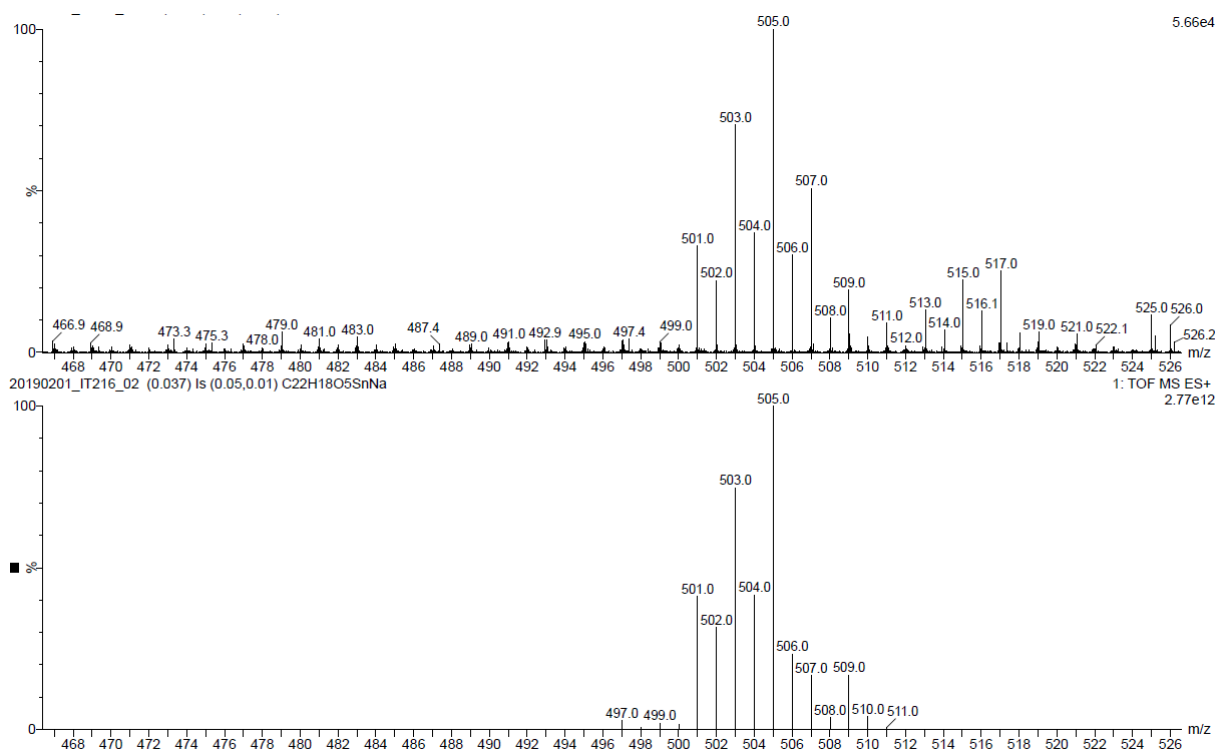

**Figure S11.** Zoom on the experimental (up) and calculated (down) isotopic fragment  $M+Na^+$  of ES-MS spectrum of  $SnPh_2$

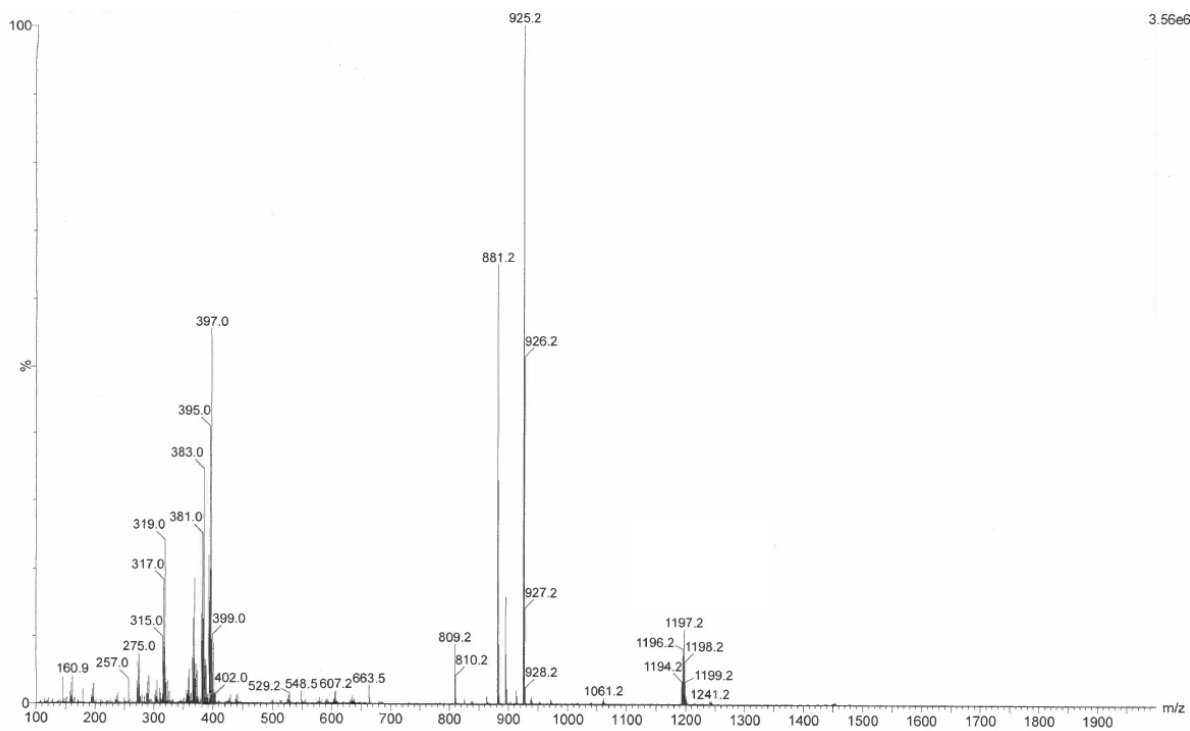

**Figure S12.** ES-MS spectrum of  $AuP-SnPh_2$ .

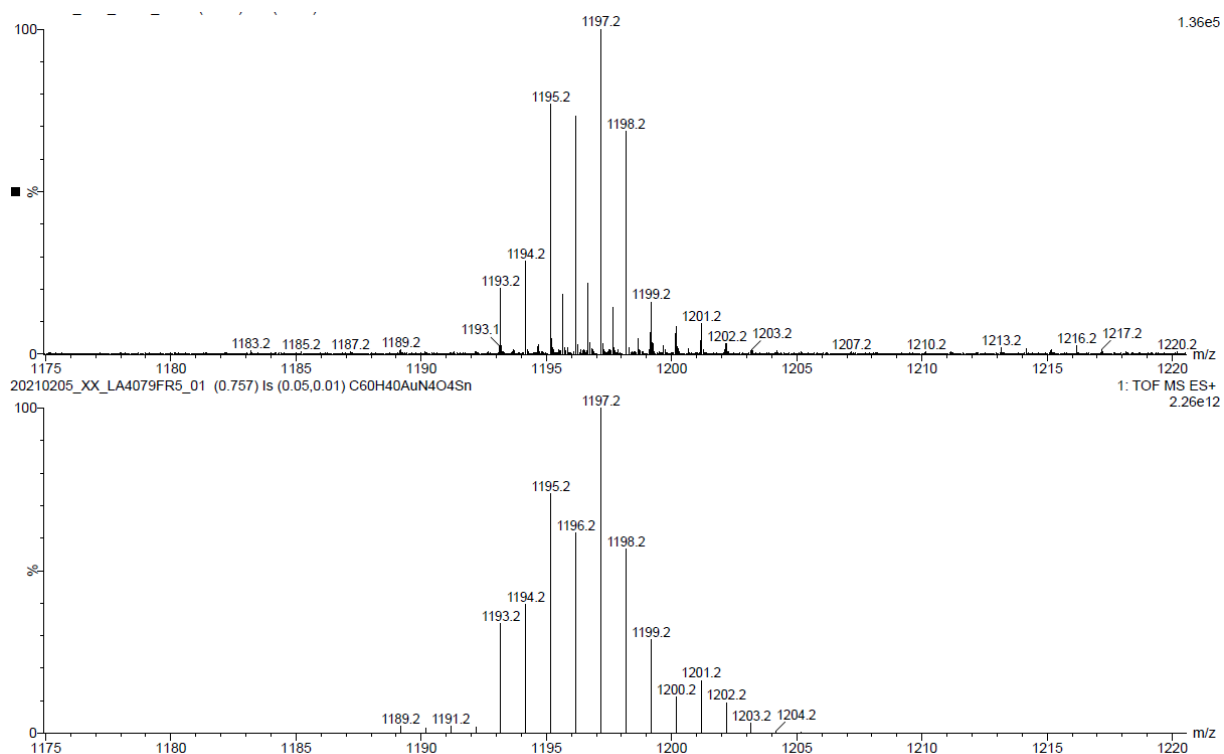

**Figure S13.** Zoom on the experimental (up) and calculated (down) isotopic fragment  $M^+$  of ES-MS spectrum of  $AuP-SnPh_2$ .

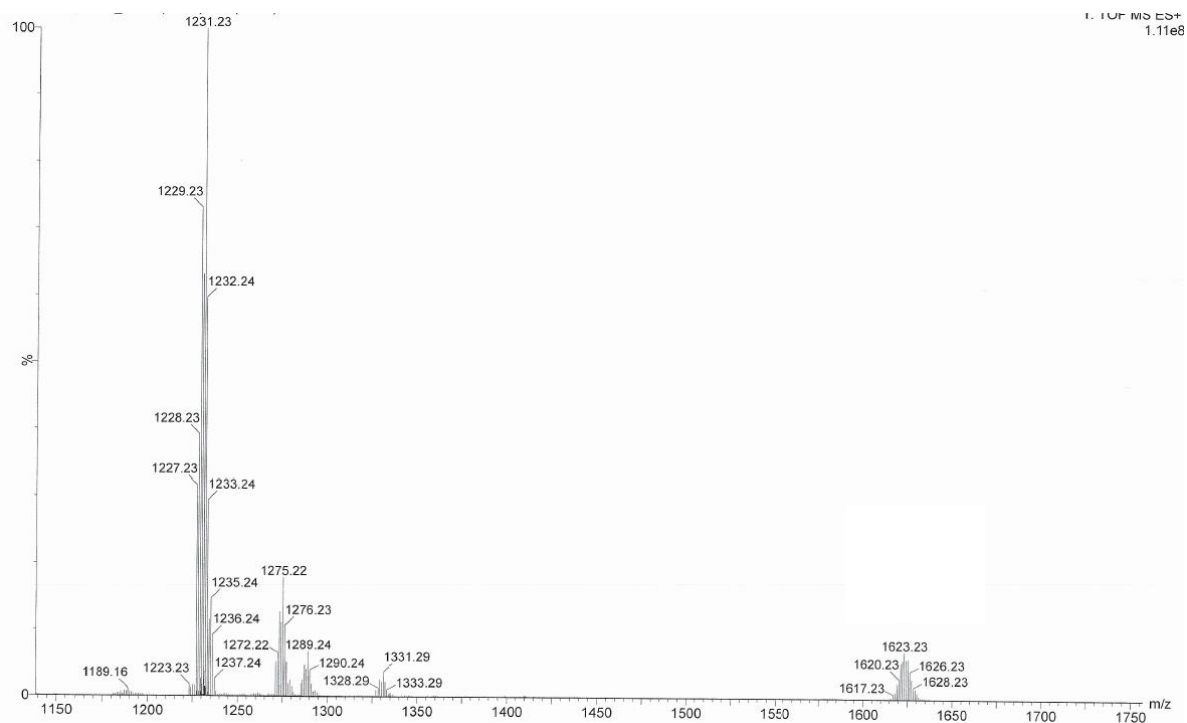

**Figure S14.** ES-MS spectrum of  $AuP-Sn_2Ph_6$ .

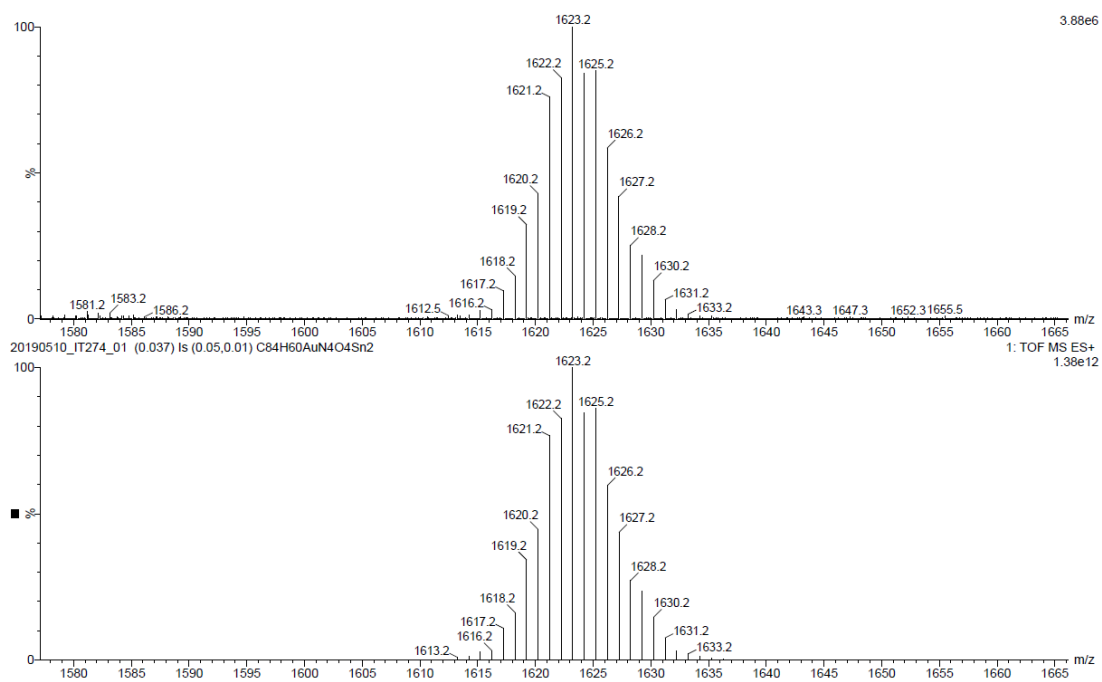

**Figure S15.** Zoom on the experimental (up) and calculated (down) isotopic fragment  $M^+$  of ES-MS spectrum of **AuP-Sn<sub>2</sub>Ph<sub>6</sub>**
